# Supplementary material for: Bridging code and timely feedback: integrating generative AI into a programming platform
Source: PeerJ journal article supplement (doi:10.7717/peerj-cs.3070), 2025-10-09
Supplement: Usability_tutorBot.pdf [file Usability_tutorBot.pdf]

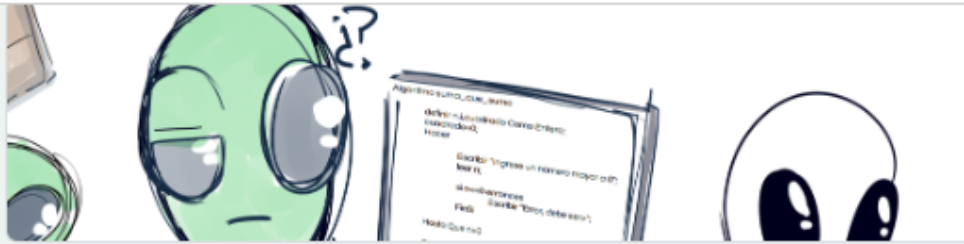

## tutorBot+ Usability

This survey is anonymous and is based on the System Usability Scale (ASUS) proposed by Brooke (1986). The idea is that you answer it considering your experience with the platform and specifically with the virtual assistant tutorBot+ while solving the problem.

[Cambiar de cuenta](#)

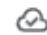

No compartido

\*Indicates that the question is required

Please indicate which version of tutorBot+ you have just used

- ☐ tutorBot+ conversational (chatbot)
- ☐ tutorBot+ non-conversational or programming platform

You must select one option for each row \*

|                                                          | Totally agree         | Agree                 | Neutral               | Disagree              | Totally disagree      |
|----------------------------------------------------------|-----------------------|-----------------------|-----------------------|-----------------------|-----------------------|
| I would like to use tutorBot+ more often.                | <input type="radio"/> |
| I think tutorBot+ is more complicated than it should be. | <input type="radio"/> |
| TutorBot+ is simple and easy to use.                     | <input type="radio"/> |
| I need technical support to use tutorBot+.               | <input type="radio"/> |

I think tutorBot+ system works well and is well integrated.

☐☐☐☐☐

I think there are a lot of inconsistencies in tutorBot+.

☐☐☐☐☐

I think most computer science students can learn to use tutorBot+ quickly.

☐☐☐☐☐

The response time of tutorBot+ is very long.

☐☐☐☐☐

I trust the feedback you give me.

☐☐☐☐☐

I need to study a lot to be able to use it.

☐☐☐☐☐

Please indicate whether you would like to continue using the SUPC platform with the tutorBot assistant from now on

- ☐ Yes
- ☐ No
- ☐ I don't know

Send

Delete Form

Este contenido no ha sido creado ni aprobado por Google. - [Términos del Servicio](#) - [Política de Privacidad](#)

Does this form look suspicious? [Informe](#)

Google Formularios
